# Supplementary material for: Shear banding in concentrated Na-caseinate emulsions
Source: Royal Society of Chemistry journal article supplement (doi:10.1039/c0sm00307g), 2010-01-01
Supplement: c0sm00307g.pdf [file c0sm00307g.pdf]

Electronic Supplementary Information

## Shear Banding in Concentrated Na-caseinate Emulsions

Hui Lin Tan, Kirk W. Feindel and Kathryn M. McGrath\*

The MacDiarmid Institute for Advanced Materials and Nanotechnology,

School of Chemical and Physical Sciences, Victoria University of Wellington, Wellington, New Zealand

\* Author for correspondence ([kathryn.mcgrath@vuw.ac.nz](mailto:kathryn.mcgrath@vuw.ac.nz))

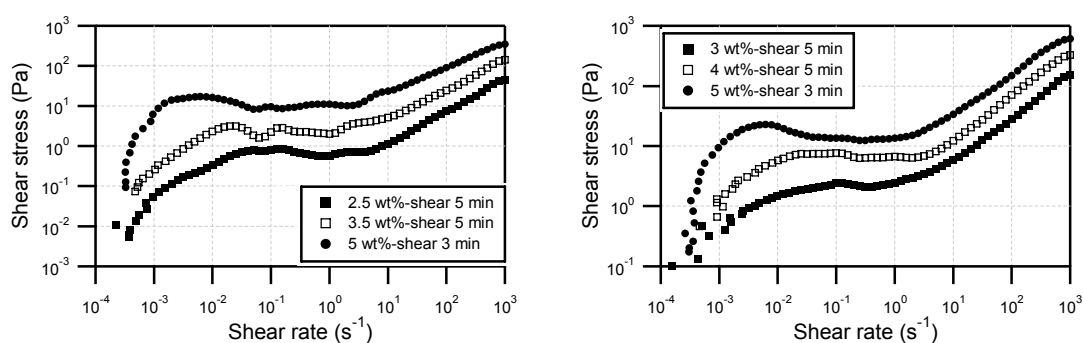

Figure 1. Steady state stress vs. shear rate curves for 53 wt% palm oil/2.5, 3.5 and 5 wt% Na-caseinate/water emulsions (left) and 55 wt% tetradecane/3, 4 and 5 wt% Na-caseinate/water emulsions (right) during up-stress ramping: 1 min rest between each shear rate, from 0.0001 to 1000  $\text{s}^{-1}$ . Shearing times required to yield a steady state response varied with concentration and are given in the legend.  $\dot{\gamma}_1$  and  $\dot{\gamma}_2$  values (see definition in Fig. 5) remain similar and span approximately two orders of magnitude on increasing Na-caseinate concentration.

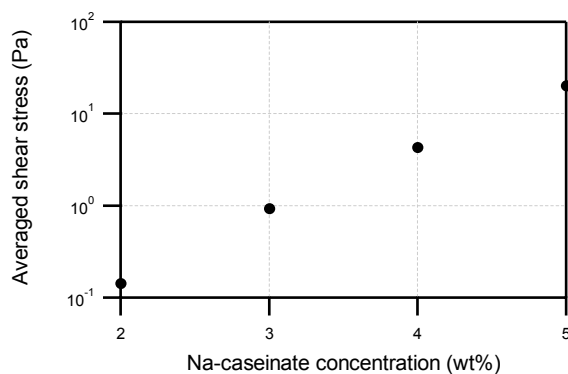

Figure 2. Variation of the average shear stress value in the plateau region upon increasing Na-caseinate concentration for 55 wt% soybean oil.
